# Supplementary material for: A Sample Preparation Method for the Simultaneous Profiling of Signaling Lipids and Polar Metabolites in Small Quantities of Muscle Tissues from a Mouse Model for Sarcopenia
Source: MDPI journal article supplement (doi:10.3390/metabo12080742), 2022-08-12
Supplement: s1 [file s1]

## **Supporting information**

### **A sample preparation method for simultaneous profiling signalling lipids and polar metabolites in small quantities of muscle tissues from a mouse model for sarcopenia**

Yupeng He<sup>1</sup>, Marlien van Mever<sup>1</sup>, Wei Yang<sup>1</sup>, LuoJiao Huang<sup>1</sup>, Rawi Ramautar<sup>1</sup>, Yvonne Rijksen<sup>2,3</sup>, Wilbert P. Vermeij<sup>2,3</sup>, Jan H.J. Hoeijmakers<sup>2,3,4,5</sup>, Amy Harms<sup>1</sup>, Peter W. Lindenburg<sup>1,6</sup>, Thomas Hankemeier<sup>1\*</sup>

<sup>1</sup>Metabolomics and Analytics Centre, Leiden Academic Centre for Drug Research, Leiden University, The Netherlands

<sup>2</sup>Princess Máxima Center for Pediatric Oncology, Utrecht, The Netherlands

<sup>3</sup>Oncode Institute, Utrecht, the Netherlands

<sup>4</sup>Department of Molecular Genetics, Erasmus MC Cancer Institute, Erasmus University Medical Center Rotterdam, Rotterdam, The Netherlands

<sup>5</sup>Institute for Genome Stability in Aging and Disease, Cologne Excellence Cluster for Cellular Stress Responses in Aging-Associated Diseases (CECAD), University of Cologne, Cologne, Germany

<sup>6</sup>Research Group Metabolomics, Leiden Center for Applied Bioscience, University of Applied Sciences Leiden, The Netherlands

(\*) corresponding author

Einsteinweg 55, 2333 CC Leiden, The Netherlands

Tel.: +31 71 527 1340, E-mail: [hankemeier@lacdr.leidenuniv.nl](mailto:hankemeier@lacdr.leidenuniv.nl)

**Table S1.** The information of lipid ISTDs.

| Name                                             | Concentration (mM) | Precursor Mass (M/Z) | Fragment Mass (M/Z) | Retention Time (min) | Class                             |
|--------------------------------------------------|--------------------|----------------------|---------------------|----------------------|-----------------------------------|
| <i>Analysed by low pH LC-MS/MS method</i>        |                    |                      |                     |                      |                                   |
| DCA-d4                                           | 1.00               | 395.3                | 349.1               | 10.2                 | Bile Acids & Steroid              |
| GCA-d4                                           | 1.00               | 468.3                | 74.05               | 5.5                  | Bile Acids & Steroid              |
| UDCA-d4                                          | 1.00               | 395.3                | 395.3               | 8.1                  | Bile Acids & Steroid              |
| GUDCA-d5                                         | 1.00               | 453.3                | 74.1                | 5                    | Bile Acids & Steroid              |
| SEA-d3                                           | 0.10               | 331.3                | 62.2                | 13.72                | Endocannabinoids                  |
| OEA-d4                                           | 0.10               | 330.3                | 66.2                | 13.35                | Endocannabinoids                  |
| PEA-d4                                           | 0.10               | 304.3                | 62.2                | 13.23                | Endocannabinoids                  |
| 2-AG-d8                                          | 0.26               | 387.3                | 294.2               | 13.21                | Endocannabinoids                  |
| 10-NO <sub>2</sub> -OA-d17                       | 2.90               | 343.2                | 183.2               | 13.2                 | Fatty acids                       |
| FA 18:1- $\omega$ 9-d17                          | 3.34               | 298.1                | 298.1               | 13.8                 | Fatty acids                       |
| FA 22:6- $\omega$ 3-d5                           | 1.50               | 332.1                | 288.4               | 13.4                 | Fatty acids                       |
| FA 20:4- $\omega$ 6-d8                           | 32.00              | 311.1                | 267.2               | 13.47                | Fatty acids                       |
| 14,15-DiHETrE-d11                                | 0.29               | 348.2                | 207.1               | 9.8                  | Oxylipins                         |
| 5-iPF <sub>2<math>\alpha</math></sub> -VI-d11    | 0.27               | 364.2                | 115.05              | 3.9                  | Oxylipins                         |
| 8,12-iPF <sub>2<math>\alpha</math></sub> -IV-d11 | 0.27               | 364.21               | 115.05              | 5.9                  | Oxylipins                         |
| 12,13-DiHOME-d4                                  | 0.31               | 317.2                | 185.1               | 9.3                  | Oxylipins                         |
| 8iso-PGE <sub>2</sub> -d4                        | 0.28               | 355.3                | 275.25              | 5.42                 | Oxylipins                         |
| 8iso-PGF <sub>2<math>\alpha</math></sub> -d4     | 0.28               | 357.3                | 197.15              | 4.75                 | Oxylipins                         |
| 9,10-DiHOME-d4                                   | 0.31               | 317.2                | 203.1               | 9.5                  | Oxylipins                         |
| 9-HODE-d4                                        | 0.33               | 299.2                | 172.1               | 11.1                 | Oxylipins                         |
| LTB <sub>4</sub> -d4                             | 0.29               | 339.5                | 197.1               | 9.2                  | Oxylipins                         |
| PGE <sub>2</sub> -d4                             | 0.28               | 355.3                | 275.25              | 5.42                 | Oxylipins                         |
| PGF <sub>2<math>\alpha</math></sub> -d4          | 0.28               | 357.3                | 197.15              | 4.75                 | Oxylipins                         |
| TXB <sub>2</sub> -d4                             | 0.27               | 373.5                | 173.3               | 3.7                  | Oxylipins                         |
| 20-HETE-d6                                       | 0.31               | 325.2                | 279.2               | 10.6                 | Oxylipins                         |
| 12-HETE-d8                                       | 0.30               | 327.2                | 184.1               | 11.7                 | Oxylipins                         |
| 5-HETE-d8                                        | 0.30               | 327.1                | 116.15              | 12.1                 | Oxylipins                         |
| <i>Analysed by high pH LC-MS/MS method</i>       |                    |                      |                     |                      |                                   |
| FA 18:1- $\omega$ 9-d17                          | 3.34               | 298.2                | 298.2               | 4.311                | Fatty acids                       |
| FA 22:6- $\omega$ 3-d5                           | 1.50               | 332.3                | 288.25              | 4.107                | Fatty acids                       |
| cLPA 17:0                                        | 2.31               | 405.2                | 269.25              | 5.529                | Lysophospholipids & Sphingolipids |
| PAF 16:0                                         | 9.00               | 572.2                | 59                  | 6.681                | Lysophospholipids & Sphingolipids |
| LPA 17:0                                         | 14.73              | 423.2                | 153.05              | 4.172                | Lysophospholipids & Sphingolipids |
| LPE 17:1                                         | 10.73              | 464.4                | 267.35              | 5.352                | Lysophospholipids & Sphingolipids |
| LPI 17:1                                         | 0.57               | 583.4                | 267.3               | 4.589                | Lysophospholipids & Sphingolipids |
| LPS 17:1                                         | 9.82               | 508.4                | 153.2               | 4.099                | Lysophospholipids & Sphingolipids |
| Sph-1-P 17:0                                     | 2.72               | 366                  | 79.05               | 3.596                | Lysophospholipids & Sphingolipids |
| Sph-1-P 17:1                                     | 2.74               | 364                  | 79                  | 3.306                | Lysophospholipids & Sphingolipids |

**Table S2.** The information of amino acids and amines ISTDs.

| Name                                                                       | Concentration<br>(mg/mL) | Molar<br>(M/Z) | mass | Retention Time<br>(min) | Class      |
|----------------------------------------------------------------------------|--------------------------|----------------|------|-------------------------|------------|
| <i>Analysed by HILIC-MS method</i>                                         |                          |                |      |                         |            |
| Asparagine- <sup>13</sup> C <sub>4</sub> , <sup>15</sup> N <sub>2</sub>    | 0.5                      | 137.0537       |      | 12.84                   | Amine      |
| Glutamate- <sup>13</sup> C <sub>5</sub> , d <sub>5</sub> , <sup>15</sup> N | 0.5                      | 157.0911       |      | 8.38                    | Amino acid |
| Isoleucine- <sup>13</sup> C, <sup>15</sup> N                               | 0.5                      | 132.0877       |      | 7.93                    | Amino acid |
| Valine- <sup>13</sup> C <sub>5</sub>                                       | 0.5                      | 121.0885       |      | 6.89                    | Amino acid |
| Leucine-d <sub>3</sub>                                                     | 0.5                      | 133.1062       |      | 7.64                    | Amino acid |
| <i>Analysed by CE-MS method</i>                                            |                          |                |      |                         |            |
| Aspartate- <sup>13</sup> C <sub>4</sub> , d <sub>3</sub> , <sup>15</sup> N | 0.5                      | 142.0448       |      | 14.10                   | Amino acid |
| Glutamate- <sup>13</sup> C <sub>5</sub> , d <sub>5</sub> , <sup>15</sup> N | 0.5                      | 159.0604       |      | 12.80                   | Amino acid |
| Glutamine- <sup>13</sup> C <sub>5</sub>                                    | 0.5                      | 152.0764       |      | 12.70                   | Amine      |
| Glycine-d <sub>2</sub>                                                     | 0.5                      | 78.0322        |      | 9.80                    | Amino acid |
| Isoleucine- <sup>13</sup> C, <sup>15</sup> N                               | 0.5                      | 134.0877       |      | 11.02                   | Amino acid |
| Tryptophan- <sup>13</sup> C <sub>11</sub> , <sup>15</sup> N <sub>2</sub>   | 0.5                      | 218.0972       |      | 12.50                   | Amino acid |
| Valine- <sup>13</sup> C <sub>5</sub>                                       | 0.5                      | 123.0863       |      | 11.40                   | Amino acid |

**Table S3.** The information of energy metabolites ISTDs.

| Name                                                                              | Concentration | Molar<br>(M/Z) | mass | Retention Time<br>(min) | Class              |
|-----------------------------------------------------------------------------------|---------------|----------------|------|-------------------------|--------------------|
| <i>Spiking before sample extraction (for sample extraction method evaluation)</i> |               |                |      |                         |                    |
| ATP- <sup>13</sup> C <sub>10</sub> , <sup>15</sup> N <sub>5</sub>                 | 10 mg/mL      | 520.9885       |      | 12.74                   | Energy metabolites |
| AMP- <sup>13</sup> C <sub>10</sub> , <sup>15</sup> N <sub>5</sub>                 | 10 mg/mL      | 361.0558       |      | 7.07                    | Energy metabolites |
| UTP- <sup>13</sup> C <sub>9</sub> , <sup>15</sup> N <sub>2</sub>                  | 10 mg/mL      | 493.9613       |      | 13.90                   | Energy metabolites |
| <i>Spiking before MS analysis (only for response ratio calculation)</i>           |               |                |      |                         |                    |
| Fumarate-d <sub>2</sub>                                                           | 500 mM        | 117.0162       |      | 13.10                   | Energy metabolites |
| Pyruvate- <sup>13</sup> C <sub>3</sub>                                            | 500 mM        | 90.0188        |      | 6.45                    | Energy metabolites |
| Succinate-d <sub>4</sub>                                                          | 500 mM        | 121.0444       |      | 7.95                    | Energy metabolites |
| UMP- <sup>15</sup> N <sub>2</sub>                                                 | 500 mM        | 325.0227       |      | 7.10                    | Energy metabolites |

**Table S4.** Detected lipid metabolites in mouse muscle samples.

| Name                                             | Precursor (M/Z) | Mass | Fragment Mass (M/Z) | Retention Time (min) | ChEBI ID              | ISTD                                          | Class                |
|--------------------------------------------------|-----------------|------|---------------------|----------------------|-----------------------|-----------------------------------------------|----------------------|
| <i>Analysed by low pH LC-MS/MS method</i>        |                 |      |                     |                      |                       |                                               |                      |
| CDCA                                             | 391.2           |      | 373.25              | 10                   | 16755                 | DCA-d4                                        | Bile Acids & Steroid |
| GCA                                              | 464.2           |      | 74.1                | 5.5                  | 17687                 | GCA-d4                                        | Bile Acids & Steroid |
| GCDCA                                            | 448.21          |      | 74                  | 8.3                  | 36274                 | GUDCA-d5                                      | Bile Acids & Steroid |
| GDCA                                             | 448.22          |      | 74                  | 8.7                  | 27471                 | GUDCA-d5                                      | Bile Acids & Steroid |
| GUDCA                                            | 448.2           |      | 74                  | 5                    | 89929                 | GUDCA-d5                                      | Bile Acids & Steroid |
| 1-AG and 2-AG<br>(two peaks merged to one)       | 379.21          |      | 287                 | 13.3                 | 34071<br>and<br>52392 | 2-AG-d8                                       | Endocannabinoids     |
| AEA                                              | 348             |      | 62                  | 13                   | 2700                  | SEA-d3                                        | Endocannabinoids     |
| LEA                                              | 324             |      | 62                  | 12.9                 | 64032                 | SEA-d3                                        | Endocannabinoids     |
| OEA                                              | 326             |      | 62                  | 13.4                 | 71466                 | OEA-d4                                        | Endocannabinoids     |
| PEA                                              | 300             |      | 62                  | 13.2                 | 71464                 | PEA-d4                                        | Endocannabinoids     |
| SEA                                              | 328             |      | 62                  | 13.7                 | 85299                 | SEA-d3                                        | Endocannabinoids     |
| FA16.0                                           | 255.2           |      | 237.2               | 13.8                 | 15756                 | FA 18:1- $\omega$ 9-d17                       | Fatty acids          |
| FA18.0                                           | 283.2           |      | 265.2               | 14.1                 | 28842                 | FA 18:1- $\omega$ 9-d17                       | Fatty acids          |
| FA18.1- $\omega$ 9                               | 281.1           |      | 263.2               | 13.8                 | 16196                 | FA 18:1- $\omega$ 9-d17                       | Fatty acids          |
| FA20.3- $\omega$ 6                               | 305.1           |      | 261                 | 13.7                 | NA                    | FA 20:4- $\omega$ 6-d8                        | Fatty acids          |
| FA20.3- $\omega$ 9                               | 305.1           |      | 261                 | 13.8                 | 72865                 | FA 20:4- $\omega$ 6-d8                        | Fatty acids          |
| FA20.4- $\omega$ 6                               | 303             |      | 259                 | 13.5                 | 15843                 | FA 20:4- $\omega$ 6-d8                        | Fatty acids          |
| FA20.5- $\omega$ 3                               | 301.1           |      | 257.2               | 13.3                 | 28364                 | FA 20:4- $\omega$ 6-d8                        | Fatty acids          |
| FA22.6- $\omega$ 3                               | 327.1           |      | 283.1               | 13.4                 | 28125                 | FA 22:6- $\omega$ 3-d5                        | Fatty acids          |
| 10-HDoHE                                         | 343.21          |      | 153.1               | 11.8                 | 72640                 | 12-HETE-d8                                    | Oxylipins            |
| 11-HDoHE                                         | 343.2           |      | 121.1               | 11.9                 | 72794                 | 12-HETE-d8                                    | Oxylipins            |
| 11-HETE                                          | 319.2           |      | 167.1               | 11.6                 | 72606                 | 12-HETE-d8                                    | Oxylipins            |
| 12,13-DiHOME                                     | 313.2           |      | 183.1               | 9.3                  | 72665                 | 12,13-DiHOME-d4                               | Oxylipins            |
| 12-HEPE                                          | 317.2           |      | 179.1               | 10.8                 | NA                    | 12-HETE-d8                                    | Oxylipins            |
| 13,14dihydro-15k-PGD <sub>2</sub>                | 351.21          |      | 175.1               | 6.6                  | 72603                 | PGE <sub>2</sub> -d4                          | Oxylipins            |
| 13,14dihydro-15k-PGE <sub>2</sub>                | 351.2           |      | 175.1               | 5.7                  | 15550                 | PGE <sub>2</sub> -d4                          | Oxylipins            |
| 13,14dihydro-PGF <sub>2<math>\alpha</math></sub> | 355.2           |      | 311.3               | 5.4                  | 63976                 | PGF <sub>2<math>\alpha</math></sub> -d4       | Oxylipins            |
| 13-HODE                                          | 295.2           |      | 195.2               | 11                   | 72639                 | 9-HODE-d4                                     | Oxylipins            |
| 14,15-DiHETrE                                    | 337.2           |      | 207.1               | 9.8                  | 63966                 | 14,15-DiHETrE-d11                             | Oxylipins            |
| 14-HDoHE                                         | 343.2           |      | 205.1               | 11.7                 | 72647                 | 12-HETE-d8                                    | Oxylipins            |
| 15S-HETrE                                        | 321.2           |      | 221.1               | 12                   | 88348                 | 5-HETE-d8                                     | Oxylipins            |
| 17-HDoHE                                         | 343.2           |      | 281.2               | 11.2                 | 72637                 | 12-HETE-d8                                    | Oxylipins            |
| 18-HEPE                                          | 317.2           |      | 299.2               | 10.4                 | 72802                 | 12-HETE-d8                                    | Oxylipins            |
| 19,20-DiHDPA                                     | 361.2           |      | 273.2               | 9.9                  | 72657                 | 14,15-DiHETrE-d11                             | Oxylipins            |
| 1a,1b-dihomo-PGF <sub>2<math>\alpha</math></sub> | 381.1           |      | 337.45              | 7.3                  | NA                    | PGF <sub>2<math>\alpha</math></sub> -d4       | Oxylipins            |
| 20-HETE                                          | 319.2           |      | 289.2               | 10.6                 | 34306                 | 20-HETE-d6                                    | Oxylipins            |
| 5-HETE                                           | 319.2           |      | 115.15              | 12.3                 | 28209                 | 5-HETE-d8                                     | Oxylipins            |
| 5-iPF <sub>2<math>\alpha</math></sub> -VI        | 353.2           |      | 115.05              | 4                    | 140933                | 5-iPF <sub>2<math>\alpha</math></sub> -VI-d11 | Oxylipins            |
| 7-HDoHE                                          | 343.2           |      | 281.2               | 12.1                 | 72623                 | 12-HETE-d8                                    | Oxylipins            |

|                                |        |        |      |        |                                |           |
|--------------------------------|--------|--------|------|--------|--------------------------------|-----------|
| 8-12-iso-iPF <sub>2α</sub> -VI | 353.21 | 115.05 | 6    | NA     | 8,12-iPF <sub>2α</sub> -IV-d11 | Oxylipins |
| 8-9-DiHETrE                    | 337.2  | 127.2  | 10.3 | 63970  | 14,15-DiHETrE-d11              | Oxylipins |
| 8-HDoHE                        | 343.2  | 189.1  | 12.1 | 72610  | 12-HETE-d8                     | Oxylipins |
| 8-HETE                         | 319.2  | 155.1  | 11.8 | 34486  | 5-HETE-d8                      | Oxylipins |
| 8iso-15R-PGF <sub>2α</sub>     | 353.1  | 193.1  | 3.5  | NA     | 8iso-PGF <sub>2α</sub> -d4     | Oxylipins |
| 8iso-PGE <sub>1</sub>          | 353.2  | 317.2  | 4.7  | NA     | 8iso-PGE <sub>2</sub> -d4      | Oxylipins |
| 8iso-PGE <sub>2</sub>          | 351.1  | 271.15 | 4.5  | 131888 | 8iso-PGE <sub>2</sub> -d4      | Oxylipins |
| 8iso-PGF <sub>1α</sub>         | 355.2  | 311.1  | 4.5  | NA     | 8iso-PGF <sub>2α</sub> -d4     | Oxylipins |
| 8iso-PGF <sub>2α</sub>         | 353.1  | 193.1  | 3.7  | 34509  | 8iso-PGF <sub>2α</sub> -d4     | Oxylipins |
| 8(S)-HETrE                     | 321.2  | 303.2  | 12.3 | 140473 | 12-HETE-d8                     | Oxylipins |
| 9-10-13-TriHOME                | 329.2  | 171.1  | 4.4  | NA     | 12-HETE-d8                     | Oxylipins |
| 9-10-DiHOME                    | 313.2  | 201.05 | 9.6  | 72663  | 9,10-DiHOME-d4                 | Oxylipins |
| 9-HEPE                         | 317.2  | 167.25 | 10.9 | 89570  | 12-HETE-d8                     | Oxylipins |
| 9-HETE                         | 319.21 | 167.1  | 12   | 72786  | 12-HETE-d8                     | Oxylipins |
| 9-HODE                         | 295.21 | 171.1  | 11.1 | 72651  | 9-HODE-d4                      | Oxylipins |
| iPF <sub>2α</sub> -IV          | 353.3  | 127.1  | 3.2  | NA     | 5-iPF <sub>2α</sub> -VI-d11    | Oxylipins |
| PGD <sub>2</sub>               | 351.1  | 271.15 | 5.1  | 15555  | PGE <sub>2</sub> -d4           | Oxylipins |
| PGD <sub>3</sub>               | 349.2  | 269.2  | 3.6  | 34939  | PGE <sub>2</sub> -d4           | Oxylipins |
| PGE <sub>2</sub>               | 351.1  | 271.15 | 4.8  | 15551  | PGE <sub>2</sub> -d4           | Oxylipins |
| PGF <sub>2α</sub>              | 353.1  | 193.1  | 4.6  | 28031  | PGF <sub>2α</sub> -d4          | Oxylipins |
| TXB <sub>2</sub>               | 369.2  | 169.1  | 3.8  | 15553  | TXB <sub>2</sub> -d4           | Oxylipins |

***Analysed by high pH LC-MS/MS method***

|           |       |        |     |       |                 |                                   |
|-----------|-------|--------|-----|-------|-----------------|-----------------------------------|
| FA18.3-ω3 | 277.1 | 233.15 | 3.9 | 27432 | FA 18:1-ω9-d17_ | Fatty acids                       |
| FA22.4-ω6 | 331.2 | 287.4  | 5.1 | NA    | FA 22:6-ω3-d5   | Fatty acids                       |
| FA22.5-ω3 | 329.2 | 285.4  | 4.7 | NA    | FA 22:6-ω3-d5   | Fatty acids                       |
| FA22.5-ω6 | 329.2 | 285.4  | 4.8 | NA    | FA 22:6-ω3-d5   | Fatty acids                       |
| cLPA16.1  | 389.1 | 253    | 4.7 | NA    | cLPA 17:0       | Lysophospholipids & Sphingolipids |
| cLPA18.0  | 419.1 | 283    | 5.9 | NA    | cLPA 17:0       | Lysophospholipids & Sphingolipids |
| cLPA18.1  | 417.2 | 281    | 5.4 | 62838 | cLPA 17:0       | Lysophospholipids & Sphingolipids |
| cLPA18.2  | 415.1 | 279    | 5   | NA    | cLPA 17:0       | Lysophospholipids & Sphingolipids |
| LPA14.0   | 381.2 | 153.05 | 3.2 | 62833 | LPA 17:0        | Lysophospholipids & Sphingolipids |
| LPA16.1   | 407.2 | 153.05 | 3.5 | 75070 | LPA 17:0        | Lysophospholipids & Sphingolipids |
| LPA18.0   | 437.3 | 153.05 | 4.5 | 74850 | LPA 17:0        | Lysophospholipids & Sphingolipids |
| LPA18.1   | 435.2 | 153.05 | 4.1 | 62837 | LPA 17:0        | Lysophospholipids & Sphingolipids |
| LPA18.2   | 433.2 | 153.05 | 3.7 | 62834 | LPA 17:0        | Lysophospholipids & Sphingolipids |
| LPA20.4   | 457   | 153.05 | 3.9 | 73792 | LPA 17:0        | Lysophospholipids & Sphingolipids |
| LPA22.4   | 485.2 | 153.05 | 4.4 | NA    | LPA 17:0        | Lysophospholipids & Sphingolipids |
| LPE14.0   | 424.4 | 196.15 | 4.7 | NA    | LPE 17:1        | Lysophospholipids & Sphingolipids |
| LPE16.0   | 452.4 | 196.15 | 5.5 | 73134 | LPE 17:1        | Lysophospholipids & Sphingolipids |

|         |       |        |     |        |          |                                   |
|---------|-------|--------|-----|--------|----------|-----------------------------------|
| LPE16.1 | 450.4 | 196.15 | 5   | NA     | LPE 17:1 | Lysophospholipids & Sphingolipids |
| LPE18.0 | 480.4 | 196.25 | 6.3 | 83047  | LPE 17:1 | Lysophospholipids & Sphingolipids |
| LPE18.1 | 478.4 | 196.25 | 5.7 | 75168  | LPE 17:1 | Lysophospholipids & Sphingolipids |
| LPE18.2 | 476.4 | 196.25 | 5.2 | 83058  | LPE 17:1 | Lysophospholipids & Sphingolipids |
| LPE18.3 | 474.4 | 196.25 | 4.9 | NA     | LPE 17:1 | Lysophospholipids & Sphingolipids |
| LPE20.3 | 502.4 | 196.15 | 5.6 | NA     | LPE 17:1 | Lysophospholipids & Sphingolipids |
| LPE20.4 | 500.4 | 196.15 | 5.3 | 64395  | LPE 17:1 | Lysophospholipids & Sphingolipids |
| LPE20.5 | 498.4 | 196.15 | 4.9 | NA     | LPE 17:1 | Lysophospholipids & Sphingolipids |
| LPE22.4 | 528.4 | 196.15 | 5.9 | NA     | LPE 17:1 | Lysophospholipids & Sphingolipids |
| LPE22.5 | 526.4 | 196.15 | 5.5 | NA     | LPE 17:1 | Lysophospholipids & Sphingolipids |
| LPE22.6 | 524.4 | 196.15 | 5.3 | 72747  | LPE 17:1 | Lysophospholipids & Sphingolipids |
| LPG14.0 | 455.1 | 227.3  | 4.1 | 73092  | LPI 17:1 | Lysophospholipids & Sphingolipids |
| LPG16.0 | 483.1 | 255.3  | 4.9 | 75376  | LPI 17:1 | Lysophospholipids & Sphingolipids |
| LPG16.1 | 481.1 | 253.3  | 4.3 | 138795 | LPI 17:1 | Lysophospholipids & Sphingolipids |
| LPG18.0 | 511.1 | 283.3  | 5.5 | 73091  | LPI 17:1 | Lysophospholipids & Sphingolipids |
| LPG18.1 | 509.1 | 281.3  | 5   | 72952  | LPI 17:1 | Lysophospholipids & Sphingolipids |
| LPG18.2 | 507.1 | 279.3  | 4.6 | NA     | LPI 17:1 | Lysophospholipids & Sphingolipids |
| LPG20.3 | 533.1 | 305.3  | 5   | NA     | LPI 17:1 | Lysophospholipids & Sphingolipids |
| LPG20.4 | 531.1 | 303.3  | 4.8 | NA     | LPI 17:1 | Lysophospholipids & Sphingolipids |
| LPG22.4 | 559.1 | 331.3  | 5.2 | NA     | LPI 17:1 | Lysophospholipids & Sphingolipids |
| LPI16.1 | 569.1 | 253.25 | 4.3 | NA     | LPI 17:1 | Lysophospholipids & Sphingolipids |
| LPI18.0 | 599.1 | 283.25 | 5.4 | NA     | LPI 17:1 | Lysophospholipids & Sphingolipids |
| LPI18.1 | 597.1 | 281.25 | 4.8 | NA     | LPI 17:1 | Lysophospholipids & Sphingolipids |
| LPI18.2 | 595.1 | 153.05 | 4.5 | NA     | LPI 17:1 | Lysophospholipids & Sphingolipids |
| LPI20.4 | 619.1 | 303.25 | 4.6 | NA     | LPI 17:1 | Lysophospholipids & Sphingolipids |
| LPI22.4 | 647.2 | 331.2  | 5.1 | NA     | LPI 17:1 | Lysophospholipids & Sphingolipids |
| LPI22.6 | 643.2 | 327.2  | 4.6 | 138564 | LPI 17:1 | Lysophospholipids & Sphingolipids |
| LPS18.1 | 522.4 | 153.1  | 4.4 | 52649  | LPS 17:1 | Lysophospholipids & Sphingolipids |
| LPS18.2 | 520.1 | 153.05 | 4.1 | NA     | LPS 17:1 | Lysophospholipids & Sphingolipids |
| LPS20.4 | 544.1 | 153.05 | 4.1 | 85435  | LPS 17:1 | Lysophospholipids & Sphingolipids |

|         |       |        |     |    |          |                                   |
|---------|-------|--------|-----|----|----------|-----------------------------------|
| LPS22.4 | 572.1 | 153.05 | 4.6 | NA | LPS 17:1 | Lysophospholipids & Sphingolipids |
| LPS22.6 | 568.1 | 153.05 | 4.1 | NA | LPS 17:1 | Lysophospholipids & Sphingolipids |

(Note: NA means nothing found).

**Table S5.** Detected polar metabolites in mouse muscle samples.

| Metabolites name                                              | ChEBI ID | Molar mass (M/Z) | Retention time (min) | ISTD                                                                    | Class              |
|---------------------------------------------------------------|----------|------------------|----------------------|-------------------------------------------------------------------------|--------------------|
| <i>Analysed by HILIC-MS method (negative ionization mode)</i> |          |                  |                      |                                                                         |                    |
| 6-phosphogluconic acid                                        | 48928    | 275.0174         | 10.1                 | Fumarate-d <sub>2</sub>                                                 | Energy metabolites |
| Acetyl-CoA                                                    | 15351    | 808.1185         | 7.4                  | Fumarate-d <sub>2</sub>                                                 | Energy metabolites |
| Adenosine                                                     | 16335    | 266.0889         | 3.8                  | Pyruvate- <sup>13</sup> C <sub>3</sub>                                  | Energy metabolites |
| ADP                                                           | 16761    | 426.0221         | 9.4                  | AMP- <sup>13</sup> C <sub>10</sub> , <sup>15</sup> N <sub>5</sub>       | Energy metabolites |
| AMP                                                           | 16027    | 346.0558         | 7.0                  | AMP- <sup>13</sup> C <sub>10</sub> , <sup>15</sup> N <sub>5</sub>       | Energy metabolites |
| Ascorbic acid                                                 | 29073    | 175.0242         | 6.7                  | Valine- <sup>13</sup> C <sub>5</sub>                                    | Energy metabolites |
| ATP                                                           | 15422    | 505.9885         | 11.5                 | ATP- <sup>13</sup> C <sub>10</sub> , <sup>15</sup> N <sub>5</sub>       | Energy metabolites |
| cAMP                                                          | 17489    | 328.0452         | 5.7                  | UMP- <sup>15</sup> N <sub>2</sub>                                       | Energy metabolites |
| CDP                                                           | 17239    | 402.0109         | 10.7                 | UMP- <sup>15</sup> N <sub>2</sub>                                       | Energy metabolites |
| cis-Aconitate                                                 | 16383    | 173.0085         | 6.7                  | Valine- <sup>13</sup> C <sub>5</sub>                                    | Energy metabolites |
| CMP                                                           | 17361    | 322.0446         | 8.8                  | UMP- <sup>15</sup> N <sub>2</sub>                                       | Energy metabolites |
| CTP                                                           | 17677    | 481.9772         | 13.0                 | UMP- <sup>15</sup> N <sub>2</sub>                                       | Energy metabolites |
| Cytidine                                                      | 17562    | 242.0776         | 5.7                  | Leucine-d <sub>3</sub>                                                  | Energy metabolites |
| Dihydroxyacetone-P                                            | 16108    | 168.9907         | 9.1                  | Fumarate-d <sub>2</sub>                                                 | Energy metabolites |
| Fructose-6-P                                                  | 78697    | 259.0224         | 9.6                  | Fumarate-d <sub>2</sub>                                                 | Energy metabolites |
| GABA                                                          | 16865    | 102.0561         | 10.6                 | Asparagine- <sup>13</sup> C <sub>4</sub> , <sup>15</sup> N <sub>2</sub> | Amino acid         |
| GDP                                                           | 17552    | 442.0171         | 13.3                 | UMP- <sup>15</sup> N <sub>2</sub>                                       | Energy metabolites |
| Glucose                                                       | 17234    | 179.0561         | 7.5                  | Fumarate-d <sub>2</sub>                                                 | Energy metabolites |
| Glucose-1-P                                                   | 58601    | 259.0224         | 9.1                  | Fumarate-d <sub>2</sub>                                                 | Energy metabolites |
| Glucose-6-P                                                   | 14314    | 259.0224         | 10.2                 | Fumarate-d <sub>2</sub>                                                 | Energy metabolites |
| Glyceraldehyde-3-P                                            | 17138    | 168.9907         | 8.4                  | Fumarate-d <sub>2</sub>                                                 | Energy metabolites |
| Glycerate-3-P                                                 | 58272    | 184.9857         | 9.2                  | Fumarate-d <sub>2</sub>                                                 | Energy metabolites |
| GMP                                                           | NA       | 362.0507         | 8.9                  | UMP- <sup>15</sup> N <sub>2</sub>                                       | Energy metabolites |
| GTP                                                           | 15996    | 521.9834         | 13.6                 | UMP- <sup>15</sup> N <sub>2</sub>                                       | Energy metabolites |
| Guanosine                                                     | 16750    | 282.0838         | 6.1                  | Isoleucine- <sup>13</sup> C, <sup>15</sup> N                            | Energy metabolites |
| Hypoxanthine                                                  | 17368    | 135.0306         | 4.1                  | Pyruvate- <sup>13</sup> C <sub>3</sub>                                  | Energy metabolites |
| IMP                                                           | 17202    | 347.0398         | 7.9                  | UMP- <sup>15</sup> N <sub>2</sub>                                       | Energy metabolites |
| Inosine                                                       | 17596    | 267.0728         | 5.4                  | Leucine-d <sub>3</sub>                                                  | Energy metabolites |
| Malate                                                        | 25115    | 133.0142         | 7.1                  | Fumarate-d <sub>2</sub>                                                 | Energy metabolites |
| Oxogluthathione                                               | 167606   | 611.1441         | 11.8                 | Asparagine- <sup>13</sup> C <sub>4</sub> , <sup>15</sup> N <sub>2</sub> | Energy metabolites |
| Phosphoenolpyruvate                                           | 18021    | 166.9751         | 8.9                  | Asparagine- <sup>13</sup> C <sub>4</sub> , <sup>15</sup> N <sub>2</sub> | Energy metabolites |
| Pyruvate                                                      | 15361    | 87.0088          | 3.7                  | Pyruvate- <sup>13</sup> C <sub>3</sub>                                  | Energy metabolites |
| Succinic acid                                                 | 15741    | 117.0193         | 5.8                  | Succinate-d <sub>4</sub>                                                | Energy metabolites |
| UDP                                                           | 17659    | 402.9949         | 9.6                  | UMP- <sup>15</sup> N <sub>2</sub>                                       | Energy metabolites |
| UMP                                                           | 28895    | 323.0286         | 7.2                  | UMP- <sup>15</sup> N <sub>2</sub>                                       | Energy metabolites |
| Uridine                                                       | 16704    | 243.0616         | 4.3                  | Pyruvate- <sup>13</sup> C <sub>3</sub>                                  | Energy metabolites |

|                                                            |       |          |      |                                                                            |                    |
|------------------------------------------------------------|-------|----------|------|----------------------------------------------------------------------------|--------------------|
| UTP                                                        | 15713 | 482.9613 | 11.6 | UTP- <sup>13</sup> C <sub>9</sub> , <sup>15</sup> N <sub>2</sub>           | Energy metabolites |
| Xanthine                                                   | 15318 | 151.0255 | 3.9  | Pyruvate- <sup>13</sup> C <sub>3</sub>                                     | Energy metabolites |
| α-Ketoglutarate                                            | 80619 | 145.0142 | 6.7  | Fumarate-d <sub>2</sub>                                                    | Energy metabolites |
| Tyrosine                                                   | 18186 | 180.0666 | 7.4  | Valine- <sup>13</sup> C <sub>5</sub>                                       | Amino acid         |
| Alanine                                                    | 15570 | 90.0550  | 8.9  | Glutamate- <sup>13</sup> C <sub>5</sub> , d <sub>5</sub> , <sup>15</sup> N | Amino acid         |
| Phenylalanine                                              | 28044 | 164.0717 | 5.6  | Leucine-d <sub>3</sub>                                                     | Amino acid         |
| Asparagine                                                 | 17196 | 131.0462 | 9.8  | Asparagine- <sup>13</sup> C <sub>4</sub> , <sup>15</sup> N <sub>2</sub>    | Amine              |
| Leucine                                                    | 25017 | 130.0874 | 5.8  | Leucine-d <sub>3</sub>                                                     | Amino acid         |
| Ornithine                                                  | 18257 | 131.0826 | 10.5 | Asparagine- <sup>13</sup> C <sub>4</sub> , <sup>15</sup> N <sub>2</sub>    | Amino acid         |
| <i>Analysed by CE-MS method (positive ionization mode)</i> |       |          |      |                                                                            |                    |
| Creatine                                                   | 16919 | 132.0768 | 9.6  | Glycine-d <sub>2</sub>                                                     | Energy metabolites |
| Arginine                                                   | 29016 | 175.1190 | 7.6  | Valine- <sup>13</sup> C <sub>5</sub>                                       | Amino acid         |
| Spermidine                                                 | 16610 | 146.1652 | 4.5  | Glutamine- <sup>13</sup> C <sub>5</sub>                                    | Amine              |
| Aspartic acid                                              | 17364 | 134.0448 | 14.1 | Aspartate- <sup>13</sup> C <sub>4</sub> , d <sub>3</sub> , <sup>15</sup> N | Amino acid         |
| Lysine                                                     | 18019 | 147.1190 | 7.2  | Valine- <sup>13</sup> C <sub>5</sub>                                       | Amino acid         |
| Valine                                                     | 27266 | 118.0863 | 11.4 | Valine- <sup>13</sup> C <sub>5</sub>                                       | Amino acid         |
| Methionine                                                 | 16811 | 150.0583 | 12.8 | Isoleucine- <sup>13</sup> C, <sup>15</sup> N                               | Amino acid         |
| Glutamine                                                  | 28300 | 147.0764 | 12.7 | Glutamine- <sup>13</sup> C <sub>5</sub>                                    | Amine              |
| Serine                                                     | 17822 | 106.0499 | 11.8 | Aspartate- <sup>13</sup> C <sub>4</sub> , d <sub>3</sub> , <sup>15</sup> N | Amino acid         |
| Threonine                                                  | 16857 | 120.0655 | 12.3 | Aspartate- <sup>13</sup> C <sub>4</sub> , d <sub>3</sub> , <sup>15</sup> N | Amino acid         |
| Glutamic acid                                              | 18237 | 148.0604 | 12.8 | Glutamate- <sup>13</sup> C <sub>5</sub> , d <sub>5</sub> , <sup>15</sup> N | Amino acid         |
| Glycine                                                    | 15428 | 76.0393  | 9.8  | Glycine-d <sub>2</sub>                                                     | Amino acid         |
| Histidine                                                  | 27570 | 156.0768 | 7.7  | Valine- <sup>13</sup> C <sub>5</sub>                                       | Amino acid         |
| Tryptophan                                                 | 16828 | 205.0972 | 12.5 | Tryptophan- <sup>13</sup> C <sub>11</sub> , <sup>15</sup> N <sub>2</sub>   | Amino acid         |
| 4-Hydroxyproline                                           | 20392 | 132.0655 | 9.3  | Valine- <sup>13</sup> C <sub>5</sub>                                       | Amino acid         |
| Proline                                                    | 26271 | 116.0706 | 13.3 | Valine- <sup>13</sup> C <sub>5</sub>                                       | Amino acid         |
| Creatinine                                                 | 16737 | 114.0662 | 6.8  | Glycine-d <sub>2</sub>                                                     | Amine              |

(Note: NA means nothing found).
